# Supplementary material for: Diagnostic Criteria for Identifying Individuals at High Risk of Progression From Mild or Moderate to Severe Alcohol Use Disorder
Source: PubMed Central journal article supplement (PMC10565602; doi:10.1001/jamanetworkopen.2023.37192), 2023-10-10
Supplement: jamanetwopen-e2337192-s002.pdf [file jamanetwopen-e2337192-s002.pdf]

| <b>*Group Name(s): Collaborative Study on the Genetics of Alcoholism (COGA)</b> |                   |                              |                         |                                                                     |                                                 |                                                                |                                                                                                   |
|---------------------------------------------------------------------------------|-------------------|------------------------------|-------------------------|---------------------------------------------------------------------|-------------------------------------------------|----------------------------------------------------------------|---------------------------------------------------------------------------------------------------|
| <b>*First Name and Middle Initial(s)</b>                                        | <b>*Last Name</b> | <b>*Suffix (eg, Jr, III)</b> | <b>Academic Degrees</b> | <b>Institution</b>                                                  | <b>Location (city, state/province, country)</b> | <b>Role or Contribution, eg, chair, principal investigator</b> | <b>Group (if more than 1 Group listed in the byline) and/or Subgroup (eg, Steering Committee)</b> |
| Victor                                                                          | Hesselbrock       |                              | PhD                     | University of Connecticut                                           | Farmington, CT, USA                             | Principal Investigator                                         |                                                                                                   |
| Tatiana                                                                         | Foroud            |                              | PhD                     | Indiana University                                                  | Indianapolis, IN, USA                           | Principal Investigator                                         |                                                                                                   |
| Yunlong                                                                         | Liu               |                              | PhD                     | Indiana University                                                  | Indianapolis, IN, USA                           | Site Lead                                                      |                                                                                                   |
| Samuel                                                                          | Kuperman          |                              | MD                      | University of Iowa                                                  | Iowa City, IA, USA                              | Site Lead                                                      |                                                                                                   |
| Ashwini K.                                                                      | Pandey            |                              | PhD                     | SUNY Downstate Health Sciences University                           | Brooklyn, NY, USA                               | Site Lead                                                      |                                                                                                   |
| Laura J.                                                                        | Bierut            |                              | MD                      | Washington University in St. Louis                                  | St. Louis, MO, USA                              | Site Lead                                                      |                                                                                                   |
| John                                                                            | Rice              |                              | PhD                     | Washington University in St. Louis                                  | St. Louis, MO, USA                              | Site Lead                                                      |                                                                                                   |
| Jay A.                                                                          | Tischfield        |                              | PhD                     | Rutgers University                                                  | Piscataway, NJ, USA                             | Site Lead                                                      |                                                                                                   |
| Ronald P.                                                                       | Hart              |                              | PhD                     | Rutgers University                                                  | Piscataway, NJ, USA                             | Site Lead                                                      |                                                                                                   |
| Laura                                                                           | Almasy            |                              | PhD                     | The Children's Hospital of Philadelphia; University of Pennsylvania | Philadelphia, PA, USA                           | Site Lead                                                      |                                                                                                   |
| Alison                                                                          | Goate             |                              | Dphil                   | Icahn School of Medicine at Mount Sinai                             | New York City, NY, USA                          | Site Lead                                                      |                                                                                                   |
| Paul                                                                            | Slesinger         |                              | PhD                     | Icahn School of Medicine at Mount Sinai                             | New York City, NY, USA                          | Site Lead                                                      |                                                                                                   |
| Denise M.                                                                       | Scott             |                              | PhD                     | Howard University                                                   | Washington, DC, USA                             | Site Lead                                                      |                                                                                                   |
| Lance O.                                                                        | Bauer             |                              | PhD                     | University of Connecticut                                           | Farmington, CT, USA                             | Collaborator                                                   |                                                                                                   |
| John I.                                                                         | Nurnberger        | Jr                           | MD, PhD                 | Indiana University                                                  | Indianapolis, IN, USA                           | Collaborator                                                   |                                                                                                   |
| Leah                                                                            | Wetherill         |                              | PhD                     | Indiana University                                                  | Indianapolis, IN, USA                           | Collaborator                                                   |                                                                                                   |
| Xiaoling                                                                        | Xuei              |                              | PhD                     | Indiana University                                                  | Indianapolis, IN, USA                           | Collaborator                                                   |                                                                                                   |
| Dongbing                                                                        | Lai               |                              | PhD                     | Indiana University                                                  | Indianapolis, IN, USA                           | Collaborator                                                   |                                                                                                   |
| Sean J.                                                                         | O'Connor          |                              | MD                      | Indiana University                                                  | Indianapolis, IN, USA                           | Collaborator                                                   |                                                                                                   |
| Grace                                                                           | Chan              |                              | PhD                     | University of Iowa; University of Connecticut                       | Farmington, CT, USA                             | Collaborator                                                   |                                                                                                   |
| David B.                                                                        | Chorlian          |                              | MS                      | SUNY Downstate Health Sciences University                           | Brooklyn, NY, USA                               | Collaborator                                                   |                                                                                                   |
| Jian                                                                            | Zhang             |                              | PhD                     | SUNY Downstate Health Sciences University                           | Brooklyn, NY, USA                               | Collaborator                                                   |                                                                                                   |
| Peter B.                                                                        | Barr              |                              | PhD                     | SUNY Downstate Health Sciences University                           | Brooklyn, NY, USA                               | Collaborator                                                   |                                                                                                   |
| Gayathri                                                                        | Pandey            |                              | PhD                     | SUNY Downstate Health Sciences University                           | Brooklyn, NY, USA                               | Collaborator                                                   |                                                                                                   |
| Niamh                                                                           | Mullins           |                              | PhD                     | Icahn School of Medicine at Mount Sinai                             | New York City, NY, USA                          | Collaborator                                                   |                                                                                                   |
| Andrey P.                                                                       | Anokhin           |                              | PhD                     | Washington University in St. Louis                                  | St. Louis, MO, USA                              | Collaborator                                                   |                                                                                                   |
| Sarah                                                                           | Hartz             |                              | MD, PhD                 | Washington University in St. Louis                                  | St. Louis, MO, USA                              | Collaborator                                                   |                                                                                                   |
| Scott                                                                           | Saccone           |                              | PhD                     | Washington University in St. Louis                                  | St. Louis, MO, USA                              | Collaborator                                                   |                                                                                                   |
| Jennifer C.                                                                     | Moore             |                              | PhD                     | Rutgers University                                                  | Piscataway, NJ, USA                             | Collaborator                                                   |                                                                                                   |
| Fazil                                                                           | Aliev             |                              | PhD                     | Rutgers University                                                  | Piscataway, NJ, USA                             | Collaborator                                                   |                                                                                                   |
| Zhiping                                                                         | Pang              |                              | MD, PhD                 | Rutgers University                                                  | Piscataway, NJ, USA                             | Collaborator                                                   |                                                                                                   |
| Alison                                                                          | Merikangas        |                              | MPH, PhD                | The Children's Hospital of Philadelphia; University of Pennsylvania | Philadelphia, PA, USA                           | Collaborator                                                   |                                                                                                   |
| Hemin                                                                           | Chin              |                              | PhD                     | National Institute of Alcohol Abuse and Alcoholism                  | Bethesda, MD, USA                               | Staff Collaborator                                             |                                                                                                   |
| Abbas                                                                           | Parsian           |                              | PhD                     | National Institute of Alcohol Abuse and Alcoholism                  | Bethesda, MD, USA                               | Staff Collaborator                                             |                                                                                                   |
