# Supplementary material for: Diagnostic Criteria for Identifying Individuals at High Risk of Progression From Mild or Moderate to Severe Alcohol Use Disorder
Source: PubMed Central journal article supplement (PMC10565602; doi:10.1001/jamanetworkopen.2023.37192), 2023-10-10
Supplement: jamanetwopen-e2337192-s003.pdf [file jamanetwopen-e2337192-s003.pdf]

## Data Sharing Statement

Miller. Diagnostic Criteria for Identifying Individuals at High Risk of Progression From Mild or Moderate to Severe Alcohol Use Disorder. *JAMA Netw Open*. Published October 10, 2023. doi:10.1001/jamanetworkopen.2023.37192

### Data

**Data available:** No

### Additional Information

**Explanation for why data not available:** COGA data are available through the National Institute on Alcohol Abuse and Alcoholism or the database of Genotypes and Phenotypes (dbGaP; phs000763.v1.p1, phs000125.v1.p1). PGC alcohol dependence GWAS summary statistics may be obtained from the PGC website (<https://www.med.unc.edu/pgc/>). MVP GWAS summary statistics are available through dbGaP (phs001672). FinnGenR8 ICD-based AUD GWAS data were obtained from <https://r8.finngen.fi/pheno/AUD>. For more information, visit <https://finngen.gitbook.io/documentation/>.
